# Supplementary material for: Contrasting adaptive strategies to terminal drought-stress gradients in Mediterranean legumes: phenology, productivity, and water relations in wild and domesticated Lupinus luteus L
Source: PubMed Central journal article supplement (PMC4223984; doi:10.1093/jxb/eru006), 2014-03-03
Supplement: supp_eru006_jexbot110437_file001.pdf [file supp_eru006_jexbot110437_file001.pdf]

Supplementary Table 1 (S1): Temperatures (5-day means, C°) recorded during the evaluation of *L. luteus* responses to terminal drought stress. Despite vernalizing all germplasm, because of variable phenology, terminal drought had to be initiated in a staggered fashion in both 2008 and 2010. Abbreviations as follows: C, cluster defined in Berger et al. (2008b); cv, cultivar; Aus, Australian; Eur, European; W, wild).

| Terminal drought start | Genotype (n) & provenance                  | Day 5 | Day 10 | Day 15 | Day 20 | Day 25 | Day 30 | Mean |
|------------------------|--------------------------------------------|-------|--------|--------|--------|--------|--------|------|
| 25-Aug-08              | 9 (C1, Eur cv=5; C3, Aus cv=1; C3, wild=3) | 13.7  | 12.9   | 14.2   | 15.0   | 14.3   | 13.9   | 14.0 |
| 01-Sep-08              | 4 (C2, wild=2; C3, wild=2)                 | 14.4  | 13.1   | 15.3   | 15.3   | 14.4   | 13.7   | 14.4 |
| 16-Sep-08              | 1 (C2, wild)                               | 15.3  | 14.4   | 14.5   | 14.0   | 14.9   | 17.2   | 15.0 |
| 22-Sep-08              | 1 (C2, wild)                               | 13.6  | 15.4   | 13.3   | 15.7   | 18.5   | 21.6   | 16.3 |
| Min                    |                                            | 13.6  | 12.9   | 13.3   | 14.0   | 14.3   | 13.7   |      |
| Max                    |                                            | 15.3  | 15.4   | 15.3   | 15.7   | 18.5   | 21.6   |      |
| Range                  |                                            | 1.8   | 2.5    | 1.9    | 1.7    | 4.2    | 7.9    |      |
|                        |                                            |       |        |        |        |        |        |      |
| 01-Sep-10              | 1 (C2, wild)                               | 17.1  | 17.5   | 18.2   | 20.1   | 18.8   | 20.0   | 18.6 |
| 03-Sep-10              | 1 (C3, wild)                               | 17.5  | 17.6   | 19.5   | 18.9   | 19.6   | 20.1   | 18.9 |
| 08-Sep-10              | 4 (C1, Eur cv=1; C2, wild=1; C3, wild=2)   | 17.6  | 19.5   | 18.9   | 19.6   | 20.1   | 19.2   | 19.1 |
| 10-Sep-10              | 1 (C3, Aus cv)                             | 18.0  | 20.1   | 18.8   | 20.0   | 19.0   | 21.5   | 19.6 |
| 14-Sep-10              | 5 (C1, Eur cv=4; C3, wild=1)               | 19.7  | 18.7   | 20.3   | 18.7   | 21.2   | 20.0   | 19.8 |
| 20-Sep-10              | 3 (C2, wild=2; C3, wild=1)                 | 18.7  | 20.3   | 18.7   | 21.2   | 20.0   | 21.2   | 20.0 |
| 29-Sep-10              | 1 (C2, wild)                               | 19.9  | 19.7   | 20.5   | 20.7   | 21.1   | 22.1   | 20.7 |
| Min                    |                                            | 17.1  | 17.5   | 18.2   | 18.7   | 18.8   | 19.2   |      |
| Max                    |                                            | 19.9  | 20.3   | 20.5   | 21.2   | 21.2   | 22.1   |      |
| Range                  |                                            | 2.8   | 2.8    | 2.3    | 2.5    | 2.3    | 2.9    |      |
